# Supplementary material for: Genomic analysis of ST88 community-acquired methicillin resistant Staphylococcus aureus in Ghana
Source: PeerJ. 2017 Feb 28;5:e3047. doi: 10.7717/peerj.3047 (PMC5333547; doi:10.7717/peerj.3047)
Supplement: Supplemental Information 4 [file peerj-05-3047-s004.xlsx]

## Sheet: ST88_Ghanaian_GI
Table S2: Genomic regions enriched in S. aureusMRSA ST88 from Ghana
Feature	Annotation
Ghaniaian_GI-1	Replication protein
Ghaniaian_GI-1	putative tetracycline resistance protein
Ghaniaian_GI-1	tetracycline resistance protein TetM
Ghaniaian_GI-1	hypothetical protein
Ghaniaian_GI-1	hypothetical protein
Ghaniaian_GI-1	hypothetical protein
Ghaniaian_GI-1	putative ATP/GTP-binding protein
Ghaniaian_GI-1	putative antirestriction protein
Ghaniaian_GI-1	hypothetical protein
Ghaniaian_GI-1	replication initiation factor
Ghaniaian_GI-1	DNA segregation ATPase FtsK/SpoIIIE
Ghaniaian_GI-1	hypothetical protein
Ghaniaian_GI-1	hypothetical protein
Ghaniaian_GI-2	AP2 domain protein
Ghaniaian_GI-2	phage tape measure protein
Ghaniaian_GI-2	phage protein
Ghaniaian_GI-2	transcriptional activator
Ghaniaian_GI-2	hypothetical protein
Ghaniaian_GI-2	hypothetical protein
Ghaniaian_GI-2	hypothetical protein
Ghaniaian_GI-2	hypothetical protein
Ghaniaian_GI-2	putative phage protein
Ghaniaian_GI-2	acetyltransferase (GNAT) family protein
Ghaniaian_GI-2	phage protein
Ghaniaian_GI-2	phage protein
Ghaniaian_GI-2	phage protein
Ghaniaian_GI-2	phage protein
Ghaniaian_GI-2	hypothetical protein
Ghaniaian_GI-2	phage protein
Ghaniaian_GI-3	hypothetical protein
Ghaniaian_GI-3	hypothetical protein
Ghaniaian_GI-3	hypothetical protein
Ghaniaian_GI-3	hypothetical protein
Ghaniaian_GI-3	hypothetical protein
Ghaniaian_GI-3	hypothetical protein
Ghaniaian_GI-3	Phage regulatory protein Rha (Phage_pRha)
Ghaniaian_GI-3	hypothetical protein
Ghaniaian_GI-4	pathogenicity island protein integrase
Ghaniaian_GI-4	Excisionase from transposon Tn916
Ghaniaian_GI-4	Helix-turn-helix domain protein
Ghaniaian_GI-4	Sigma-70 Region 4 protein
Ghaniaian_GI-4	putative transcriptional regulator
Ghaniaian_GI-4	cassette chromosome recombinase B
Ghaniaian_GI-5	hypothetical protein
Ghaniaian_GI-5	recombinase/resolvase
Ghaniaian_GI-5	transposase for transposon Tn552
Ghaniaian_GI-5	major facilitator superfamily multidrug :cation symporter
Ghaniaian_GI-5	Gram positive anchor
Ghaniaian_GI-5	Initiator Replication protein
Ghaniaian_GI-5	putative 27.7 kDa protein
Ghaniaian_GI-5	Relaxase/Mobilisation nuclease domain protein
Ghaniaian_GI-5	Bacterial mobilisation protein (MobC)
Ghaniaian_GI-5	hypothetical protein
Ghaniaian_GI-5	ABC superfamily ATP binding cassette transporter ABC protein
Ghaniaian_GI-5	hypothetical protein
Ghaniaian_GI-5	hypothetical protein
Ghaniaian_GI-5	hypothetical protein
Ghaniaian_GI-5	hypothetical protein
Ghaniaian_GI-5	hypothetical protein
Ghaniaian_GI-5	putative transcriptional regulator
Ghaniaian_GI-5	fibrinogen-binding protein
Ghaniaian_GI-5	hypothetical protein
Ghaniaian_GI-5	hypothetical protein
Ghaniaian_GI-5	fibronectin-binding protein A
Ghaniaian_GI-5	hypothetical protein
Ghaniaian_GI-5	Replication protein
Ghaniaian_GI-5	hypothetical protein
Ghaniaian_GI-5	hypothetical protein
Ghaniaian_GI-5	Replication protein
Ghaniaian_GI-5	hypothetical protein
Ghaniaian_GI-5	phage transcriptional regulator
Ghaniaian_GI-5	hypothetical protein
Ghaniaian_GI-5	Transposase IS116/IS110/IS902 family protein
Ghaniaian_GI-5	hypothetical protein
Ghaniaian_GI-5	putative transposase for
Ghaniaian_GI-5	transposase for IS431mec
Ghaniaian_GI-5	putative deoxyribose-phosphate aldolase
Ghaniaian_GI-5	hypothetical protein
